# Supplementary material for: Direct Determination of ECD in ECD Kit: A Solid Sample Quantitation Method for Active Pharmaceutical Ingredient in Drug Product
Source: Hindawi journal article supplement (doi:10.1155/2011/196238), 2011-01-01
Supplement: f1 [file 196238.f1.pdf]

**TABLE S1:** Matrix effect on the determination of coal.

| Sample                           | Standard curve               |                                                    |                             | Peak Area <sub>blank</sub> <sup>(3)</sup> |
|----------------------------------|------------------------------|----------------------------------------------------|-----------------------------|-------------------------------------------|
|                                  | Dynamic range of sulfur (mg) | Linear least squares regression equation           | Correlation coefficient (r) |                                           |
| Coal <sup>(1)</sup>              | 0.033 - 0.142                | $Y = 1.565 \times 10^{-6}X + 3.174 \times 10^{-3}$ | 1.0000                      | 248 ± 11                                  |
| Coal in Kit blank <sup>(2)</sup> | 0.036 - 0.132                | $Y = 1.547 \times 10^{-6}X + 8.932 \times 10^{-3}$ | 0.9998                      | 2438 ± 642                                |

<sup>(1)</sup>Standard curve of coal was constructed without existence of Kit blank.

<sup>(2)</sup>Standard curve of coal was constructed with Kit blank of  $1.54 \pm 0.03$  mg.

<sup>(3)</sup>Average peak areas ( $\pm$  SD, n = 2) of tin blanks and Kit blanks, respectively.

**TABLE S2:** Inter-day results for the determination of ECD.

| Test no. | Sample <sup>(1)</sup> | Standard curve   |                                                    |                 | Sulfur<br>weight (mg) | Recovery<br>yield (%) |
|----------|-----------------------|------------------|----------------------------------------------------|-----------------|-----------------------|-----------------------|
|          |                       | Dynamic range of | Linear least squares regression                    | Correlation     |                       |                       |
|          |                       | sulfur (mg)      | equation                                           | coefficient (r) |                       |                       |
| 1        | Bk <sub>Kit</sub>     | 0.033 - 0.178    | $Y = 1.445 \times 10^{-6}X + 2.802 \times 10^{-3}$ | 0.9997          | $0.000 \pm 0.001$     | -                     |
|          | Std <sub>ECD</sub> #1 |                  |                                                    |                 | $0.127 \pm 0.002$     | $100.53 \pm 1.19$     |
|          | Std <sub>ECD</sub> #2 |                  |                                                    |                 | $0.135 \pm 0.001$     | $94.19 \pm 0.46$      |
|          | Std <sub>ECD</sub> #3 |                  |                                                    |                 | $0.157 \pm 0.001$     | $100.90 \pm 0.88$     |
|          | Std <sub>ECD</sub> #4 |                  |                                                    |                 | $0.164 \pm 0.001$     | $94.98 \pm 0.31$      |
| 2        | Bk <sub>Kit</sub>     | 0.031 - 0.144    | $Y = 1.493 \times 10^{-6}X + 2.113 \times 10^{-3}$ | 0.9987          | $0.000 \pm 0.000$     | -                     |
|          | Std <sub>ECD</sub> #1 |                  |                                                    |                 | $0.122 \pm 0.007$     | $96.47 \pm 5.92$      |
|          | Std <sub>ECD</sub> #2 |                  |                                                    |                 | $0.137 \pm 0.001$     | $95.29 \pm 0.97$      |
|          | Std <sub>ECD</sub> #3 |                  |                                                    |                 | $0.161 \pm 0.001$     | $103.66 \pm 0.72$     |
|          | Std <sub>ECD</sub> #4 |                  |                                                    |                 | $0.170 \pm 0.000$     | $98.50 \pm 0.28$      |

|   |                       |               |                                                    |        |                   |                   |
|---|-----------------------|---------------|----------------------------------------------------|--------|-------------------|-------------------|
| 3 | Bk <sub>Kit</sub>     | 0.031 - 0.144 | $Y = 1.493 \times 10^{-6}X + 2.113 \times 10^{-3}$ | 0.9987 | $0.001 \pm 0.002$ | -                 |
|   | Std <sub>ECD</sub> #1 |               |                                                    |        | $0.125 \pm 0.003$ | $98.80 \pm 2.68$  |
|   | Std <sub>ECD</sub> #2 |               |                                                    |        | $0.136 \pm 0.001$ | $94.83 \pm 0.78$  |
|   | Std <sub>ECD</sub> #3 |               |                                                    |        | $0.159 \pm 0.001$ | $102.05 \pm 0.61$ |
|   | Std <sub>ECD</sub> #4 |               |                                                    |        | $0.166 \pm 0.002$ | $96.07 \pm 0.92$  |
| 4 | Bk <sub>Kit</sub>     | 0.032 - 0.138 | $Y = 1.446 \times 10^{-6}X + 3.341 \times 10^{-3}$ | 0.9998 | $0.001 \pm 0.001$ | -                 |
|   | Std <sub>ECD</sub> #1 |               |                                                    |        | $0.130 \pm 0.001$ | $102.72 \pm 1.19$ |
|   | Std <sub>ECD</sub> #2 |               |                                                    |        | $0.138 \pm 0.001$ | $95.95 \pm 0.38$  |
|   | Std <sub>ECD</sub> #3 |               |                                                    |        | $0.159 \pm 0.000$ | $102.00 \pm 0.31$ |
|   | Std <sub>ECD</sub> #4 |               |                                                    |        | $0.162 \pm 0.000$ | $94.30 \pm 0.14$  |

---

<sup>(1)</sup>Compositions of calibration standards and blanks are shown in Table 2.

**TABLE S3:** Real-sample analytical results.

| Batch<br>No. | Standard curve                |                                                    |                                | Recovery yield<br>of QC <sub>coal</sub> (%) | ECD weight<br>(mg) <sup>(1)</sup> |
|--------------|-------------------------------|----------------------------------------------------|--------------------------------|---------------------------------------------|-----------------------------------|
|              | Dynamic range<br>of coal (mg) | Linear least squares regression<br>equation        | Correlation<br>coefficient (r) |                                             |                                   |
| 1            | 1.025 - 3.327                 | $Y = 1.624 \times 10^{-6}X + 1.600 \times 10^{-3}$ | 0.9995                         | 101.26                                      | 0.934 ± 0.021                     |
| 2            | 1.058 - 3.403                 | $Y = 1.582 \times 10^{-6}X + 1.791 \times 10^{-3}$ | 0.9994                         | 100.81<br>101.94                            | 0.952 ± 0.013                     |
| 3            | 1.033 - 3.376                 | $Y = 1.629 \times 10^{-6}X + 7.410 \times 10^{-4}$ | 0.9998                         | 99.52<br>106.62                             | 0.984 ± 0.007                     |

<sup>(1)</sup>The determined value of ECD by the proposed method; nominal weight of ECD was 0.956 mg.
